# Supplementary material
Source: HighWire-hosted journal article supplement (https://www.g3journal.org/content/suppl/2016/08/26/g3.116.032045)
Supplement: TableS1.pdf [file TableS1.pdf]

**Table S1**

**RNA-Seq datasets used to measure differential expression.** The columns show the description, accession number (acc. num.), read length, total number of reads (# reads) and total number of base pairs (# bp) of each dataset.

| Description                      | acc. num. | length | # reads  | # bp   |
|----------------------------------|-----------|--------|----------|--------|
| Leaf rep. 1                      | SRR404309 | 48     | 11220678 | 538.6M |
| Leaf rep. 2                      | SRR404310 | 48     | 10969265 | 526.5M |
| Root rep. 1                      | SRR404311 | 49     | 10657563 | 522.2M |
| Root rep. 2                      | SRR404312 | 49     | 10650553 | 521.9M |
| Flower rep. 1                    | SRR404313 | 48     | 10761639 | 516.6M |
| Flower rep. 2                    | SRR404314 | 48     | 10433160 | 500.8M |
| Flower bud rep. 1                | SRR404315 | 48     | 12988759 | 623.5M |
| Flower bud rep. 2                | SRR404316 | 48     | 12711669 | 610.2M |
| Fruit immature 1cm rep. 1        | SRR404317 | 49     | 9158268  | 448.8M |
| Fruit immature 1cm rep. 2        | SRR404318 | 49     | 9572645  | 469.1M |
| Fruit immature 2 cm fruit rep. 1 | SRR404319 | 49     | 7864754  | 385.4M |
| Fruit immature 2 cm fruit rep. 2 | SRR404320 | 49     | 9252491  | 453.4M |
| Mature green rep. 1              | SRR404324 | 48     | 8423857  | 404.3M |
| Mature green rep. 2              | SRR404325 | 48     | 10214504 | 490.3M |
| Mature breaking rep. 1           | SRR404326 | 48     | 11534326 | 553.6M |
| Mature breaking rep. 2           | SRR404327 | 48     | 11111053 | 533.3M |
| Mature red rep. 1                | SRR404328 | 48     | 14085509 | 676.1M |
| Mature red rep. 2                | SRR404329 | 48     | 13515035 | 648.7M |
